# Supplementary material for: SARS-CoV-2 uses CD4 to infect T helper lymphocytes
Source: eLife. 2023 Jul 31;12:e84790. doi: 10.7554/eLife.84790 (PMC10390044; doi:10.7554/eLife.84790)
Supplement: Supplementary file 2. [file elife-84790-supp2.xls]

## Sheet: Planilha1
Supplementary File 2
Accession	Peptide count	Unique peptides	Confidence score	Anova (p)	q Value	Max fold change	Power	Highest mean condition	Lowest mean condition	Description	TCell_Covid_T1	TCell_Covid_T1_2	TCell_Covid_T1_3	TCell_Covid_T1_4	TCell_Covid_T2	TCell_Covid_T2_2	TCell_Covid_T2_3	TCell_Covid_T2_4	Tcell_Mock_T1	Tcell_Mock_T1_2	Tcell_Mock_T1_3	Tcell_Mock_T1_4	Tcell_Mock_T2	Tcell_Mock_T2_2	Tcell_Mock_T2_3	Tcell_Mock_T2_4
Q92499	29	20	173.281	6.25699e-06	0.00200347	1.53925	0.999997	MOCK	COVID	ATP-dependent RNA helicase DDX1 OS=Homo sapiens OX=9606 GN=DDX1 PE=1 SV=2	342583	425064	329087	337830	447930	496038	412128	432093	569559	683819	635073	658825	545488	550697	659662	657497
Q16891	13	5	74.7282	4.82118e-05	0.00847867	1.64219	0.999644	MOCK	COVID	MICOS complex subunit MIC60 OS=Homo sapiens OX=9606 GN=IMMT PE=1 SV=1	222135	260495	272043	260574	254084	260726	355988	376580	413041	438624	509143	543615	369892	370044	534028	537282
Q96PK6	6	4	35.1185	0.000295183	0.0189034	1.49707	0.993225	MOCK	COVID	RNA-binding protein 14 OS=Homo sapiens OX=9606 GN=RBM14 PE=1 SV=2	13580.8	13511.5	11083.4	11005.4	11800.1	13517.1	12477.5	13178	19310.9	21693.6	15227.2	15104.4	17795.6	28048.7	16530.2	16227
O15260	3	1	24.8594	0.00055212	0.0270548	1.44078	0.984833	MOCK	COVID	Surfeit locus protein 4 OS=Homo sapiens OX=9606 GN=SURF4 PE=1 SV=3	9125.45	5820.68	9036.99	10058.7	9013.31	10312.7	8617.67	7551.07	11350.6	15826.4	10138.8	10599.3	13369.4	12107.4	13153.2	13641.7
P28065	8	4	58.371	0.000557384	0.0270548	1.83113	0.984659	MOCK	COVID	Proteasome subunit beta type-9 OS=Homo sapiens OX=9606 GN=PSMB9 PE=1 SV=2	192044	248822	141766	142150	311469	336026	237659	232285	381434	577332	507957	504356	373116	410829	299615	318697
P40227	20	15	179.955	0.000811811	0.0270548	1.30091	0.97624	MOCK	COVID	T-complex protein 1 subunit zeta OS=Homo sapiens OX=9606 GN=CCT6A PE=1 SV=3	185451	201993	193494	223443	211423	254129	242422	266532	262272	261576	294196	304895	256703	259782	337054	337685
Q08334	1	1	5.3036	0.000828747	0.0270548	2.13328	0.975685	MOCK	COVID	Interleukin-10 receptor subunit beta OS=Homo sapiens OX=9606 GN=IL10RB PE=1 SV=2	1191.4	2161.81	1227	1263.11	2133.83	1909.48	1440.1	1409.2	3408.73	2738.3	1536.92	2115.53	4209.71	5509.72	3802.2	3848.14
Q6UB99	10	4	55.1211	0.00127457	0.0293225	2.40615	0.961496	MOCK	COVID	Ankyrin repeat domain-containing protein 11 OS=Homo sapiens OX=9606 GN=ANKRD11 PE=1 SV=3	16600.7	16431.1	23549	26798.2	44238.7	41243.4	66827.1	67157.4	105260	88825.3	113359	133104	62614	41455.8	87006.7	97066.7
P49821	9	3	60.325	0.00142054	0.0296205	1.31401	0.957041	MOCK	COVID	NADH dehydrogenase [ubiquinone] flavoprotein 1_ mitochondrial OS=Homo sapiens OX=9606 GN=NDUFV1 PE=1 SV=4	124100	131069	136415	126485	129274	160696	172805	186476	147695	209148	201597	183395	208462	181251	213496	188820
Q16777	9	1	145.649	0.00169755	0.033972	1.34785	0.948846	MOCK	COVID	Histone H2A type 2-C OS=Homo sapiens OX=9606 GN=H2AC20 PE=1 SV=4	2.00125e+06	2.43076e+06	2.54308e+06	2.49698e+06	2.47484e+06	3.37927e+06	3.0141e+06	3.28824e+06	2.75635e+06	3.79239e+06	3.40291e+06	3.40541e+06	3.78086e+06	3.66166e+06	4.29057e+06	4.06188e+06
P23246	26	16	203.156	0.00181808	0.0352814	1.20084	0.945384	MOCK	COVID	Splicing factor_ proline- and glutamine-rich OS=Homo sapiens OX=9606 GN=SFPQ PE=1 SV=2	246912	251358	247031	262088	279776	316202	301777	335548	337873	318870	349977	327844	300006	378603	345961	331569
Q99878	23	11	137.854	0.0021945	0.0377282	1.35297	0.934951	MOCK	COVID	Histone H2A type 1-J OS=Homo sapiens OX=9606 GN=H2AC14 PE=1 SV=3	2.08117e+06	2.53501e+06	2.68238e+06	2.65488e+06	2.65975e+06	3.60049e+06	3.29525e+06	3.53021e+06	2.91336e+06	4.05694e+06	3.64359e+06	3.69356e+06	3.99885e+06	3.86357e+06	4.58626e+06	4.41514e+06
Q92747	3	0	16.5805	0.00503265	0.0700627	1.70527	0.870244	MOCK	COVID	Actin-related protein 2/3 complex subunit 1A OS=Homo sapiens OX=9606 GN=ARPC1A PE=2 SV=2	32539.2	21804.7	21665.4	30613.3	69030.9	91242.4	53371.9	57263.2	70544.3	100508	82727.1	70756.8	79701.3	91536.3	76114.5	71905.6
Q5JTV8	6	3	39.181	0.00707005	0.0795722	1.97707	0.83386	MOCK	COVID	Torsin-1A-interacting protein 1 OS=Homo sapiens OX=9606 GN=TOR1AIP1 PE=1 SV=2	64539.3	38396.2	77656.1	75078.5	53817.9	47776.2	105485	125751	177450	93770.5	204584	179898	125024	52021.1	168360	162399
Q01844	18	8	119.825	0.00745529	0.0795722	1.51076	0.827629	MOCK	COVID	RNA-binding protein EWS OS=Homo sapiens OX=9606 GN=EWSR1 PE=1 SV=1	67178.4	64608.9	91646.5	109386	101062	82969	136561	130683	153481	129519	183512	177007	101854	96095.9	170183	172927
P30041	15	9	140.13	0.00915761	0.0881479	1.29434	0.802059	MOCK	COVID	Peroxiredoxin-6 OS=Homo sapiens OX=9606 GN=PRDX6 PE=1 SV=3	192597	209964	192893	185014	222939	236807	250507	262683	257733	294239	363494	306812	244449	191922	312306	298543
P41240	16	8	104.794	0.0107877	0.0973587	1.1649	0.780083	MOCK	COVID	Tyrosine-protein kinase CSK OS=Homo sapiens OX=9606 GN=CSK PE=1 SV=1	118813	131724	119371	117799	144241	135572	142647	164573	141668	165816	169010	154634	133525	176436	158395	152480
P62136	13	2	97.1703	0.0113745	0.101169	1.16029	0.772675	MOCK	COVID	Serine/threonine-protein phosphatase PP1-alpha catalytic subunit OS=Homo sapiens OX=9606 GN=PPP1CA PE=1 SV=1	137830	151790	141332	132728	165986	178129	159041	163032	185832	209356	187075	189817	152139	174108	161769	166902
O00148	26	11	151.353	0.0129847	0.109412	1.36527	0.753521	MOCK	COVID	ATP-dependent RNA helicase DDX39A OS=Homo sapiens OX=9606 GN=DDX39A PE=1 SV=2	337881	492953	626725	535976	318855	290821	293581	326167	664396	421451	607663	657647	490294	529804	521727	507240
O75390	10	5	68.7388	0.0144894	0.116638	1.19468	0.736983	MOCK	COVID	Citrate synthase_ mitochondrial OS=Homo sapiens OX=9606 GN=CS PE=1 SV=2	74265.2	79653.3	99382.1	102266	89008.5	80184.3	73130.1	93858.6	102148	120828	113700	104397	98087.5	78912.5	107722	100620
Q7Z4W1	2	2	12.9957	0.0149264	0.116638	7.01218	0.732398	MOCK	COVID	L-xylulose reductase OS=Homo sapiens OX=9606 GN=DCXR PE=1 SV=2	139.834	305.714	7.03378	0	147.211	394.448	21.2354	98.3261	759.349	1065.1	67.143	127.537	1799.94	2790.76	596.883	603.462
P62140	11	1	86.6422	0.0163329	0.120224	1.19332	0.718238	MOCK	COVID	Serine/threonine-protein phosphatase PP1-beta catalytic subunit OS=Homo sapiens OX=9606 GN=PPP1CB PE=1 SV=3	115163	130818	114706	112648	153947	163644	148332	153226	168541	192814	172716	174025	139747	162432	143387	150027
O75367	10	5	83.4891	0.0184184	0.128207	1.2755	0.698737	MOCK	COVID	Core histone macro-H2A.1 OS=Homo sapiens OX=9606 GN=MACROH2A1 PE=1 SV=4	44402.1	59907.3	57895.9	52243.9	69193.2	94590.5	74356.7	81031.4	88992.3	79538.8	76063.9	75496.9	96915.5	107110	78177.4	78337.4
Q8NHP1	6	1	40.2846	0.0191393	0.128503	1.69116	0.692364	MOCK	COVID	Aflatoxin B1 aldehyde reductase member 4 OS=Homo sapiens OX=9606 GN=AKR7L PE=2 SV=7	190886	345812	495832	404433	97959.9	80698.2	92033	99969.6	498197	232396	453112	497098	320861	326826	379113	349381
P62807	19	0	296.222	0.0192636	0.128503	1.20126	0.691283	MOCK	COVID	Histone H2B type 1-C/E/F/G/I OS=Homo sapiens OX=9606 GN=H2BC4 PE=1 SV=4	1.28705e+06	1.60558e+06	1.60188e+06	1.58309e+06	2.15827e+06	2.02586e+06	1.78487e+06	1.93696e+06	1.95666e+06	2.01005e+06	1.82915e+06	1.82126e+06	2.18689e+06	2.52106e+06	2.34103e+06	2.13174e+06
P40306	6	2	37.6859	0.0197568	0.130059	1.79523	0.687043	MOCK	COVID	Proteasome subunit beta type-10 OS=Homo sapiens OX=9606 GN=PSMB10 PE=1 SV=1	141725	163703	116375	114133	45735.2	63174.5	32126.9	32473.8	95228.7	181769	108242	93348.5	182685	242115	204632	165600
Q8IUH2	2	2	16.2927	0.0202692	0.131047	1.53497	0.68272	MOCK	COVID	Protein CREG2 OS=Homo sapiens OX=9606 GN=CREG2 PE=1 SV=1	20539.6	23939.2	15894.8	15014.6	11156.1	11076.2	9012.04	10188.3	25347.1	33214.6	15442.8	14297.8	26679	29251.3	16989.4	18094.2
P24539	3	1	21.8855	0.0204635	0.131047	1.71955	0.681101	MOCK	COVID	ATP synthase F(0) complex subunit B1_ mitochondrial OS=Homo sapiens OX=9606 GN=ATP5PB PE=1 SV=2	3945.21	6280.23	8302	12326.6	12243.7	9392.45	16530.1	15868.1	21843.9	9193.6	22048.4	20866.9	13972.7	10569.6	26162.7	21311.8
Q13838	19	6	171.507	0.0216886	0.132279	1.297	0.671153	MOCK	COVID	Spliceosome RNA helicase DDX39B OS=Homo sapiens OX=9606 GN=DDX39B PE=1 SV=1	329277	486796	634852	537388	377832	368100	341357	376596	685742	405527	635761	679135	498454	512602	542418	517874
Q96AE4	26	14	192.984	0.023318	0.134573	1.12066	0.658556	MOCK	COVID	Far upstream element-binding protein 1 OS=Homo sapiens OX=9606 GN=FUBP1 PE=1 SV=3	204992	246518	215149	206923	222249	258279	234715	255635	250779	267822	222933	234611	278136	291208	262444	259075
Q16778	26	8	279.016	0.0235323	0.134573	1.22147	0.65695	MOCK	COVID	Histone H2B type 2-E OS=Homo sapiens OX=9606 GN=H2BC21 PE=1 SV=3	1.17547e+06	1.60569e+06	1.44929e+06	1.42983e+06	2.09285e+06	2.03959e+06	1.74043e+06	1.84572e+06	1.84976e+06	2.04345e+06	1.73984e+06	1.78217e+06	2.06084e+06	2.52857e+06	2.2714e+06	2.06592e+06
Q00577	3	3	16.1835	0.0307772	0.162238	1.72861	0.608372	MOCK	COVID	Transcriptional activator protein Pur-alpha OS=Homo sapiens OX=9606 GN=PURA PE=1 SV=2	6593.84	6426.85	4706.88	7304.78	1543.84	1995.78	3196.13	3234.9	4500.42	4826.53	12332.7	8111.89	5333.12	4850.42	8795.89	11755.5
P43487	3	2	16.737	0.0309075	0.162238	1.28737	0.607586	MOCK	COVID	Ran-specific GTPase-activating protein OS=Homo sapiens OX=9606 GN=RANBP1 PE=1 SV=1	35200	35551.5	26304.4	25411.9	23098.3	31772.3	20636.3	20422.1	31401.2	41353.6	25465.7	26631	36986.3	45473.2	36867.9	36978.8
O75947	12	5	123.174	0.0318842	0.164665	1.26689	0.601782	MOCK	COVID	ATP synthase subunit d_ mitochondrial OS=Homo sapiens OX=9606 GN=ATP5PD PE=1 SV=3	136194	162731	160311	148737	105608	120750	110758	111040	138417	143818	147649	122632	183968	169233	223480	208802
P54727	8	6	62.9991	0.0340723	0.1648	1.22459	0.589294	MOCK	COVID	UV excision repair protein RAD23 homolog B OS=Homo sapiens OX=9606 GN=RAD23B PE=1 SV=1	54323.2	40467	68758.4	66587.9	48905.9	58706.8	59600.4	62855.1	63785.5	57220.4	73211.9	70781.3	75230.9	53562	82762.4	87006
O95932	4	1	25.0076	0.0341459	0.1648	1.36987	0.588886	MOCK	COVID	Protein-glutamine gamma-glutamyltransferase 6 OS=Homo sapiens OX=9606 GN=TGM6 PE=1 SV=3	4981.9	4166.29	6255.93	7650.85	10270	9049.69	9107.78	10998.5	11940.4	9212.87	14093.9	12828.8	7404.16	8290.86	10917.5	10902
Q9BT78	3	2	17.0035	0.0346011	0.1648	1.39693	0.586377	MOCK	COVID	COP9 signalosome complex subunit 4 OS=Homo sapiens OX=9606 GN=COPS4 PE=1 SV=1	7937.36	8342.69	6897.33	6646.28	5425.49	5657.89	4251.68	3794.39	7388.56	10180.2	6203.43	5100.41	10716.8	11976.8	8340.69	8476.97
P22061	6	3	63.6515	0.0356008	0.167637	1.3025	0.580962	MOCK	COVID	Protein-L-isoaspartate(D-aspartate) O-methyltransferase OS=Homo sapiens OX=9606 GN=PCMT1 PE=1 SV=4	73302.2	121262	124039	123849	67201.9	67018	51678	53961.7	119061	98103.7	117026	133230	95153.3	115705	102421	108015
O43242	8	5	41.644	0.0368677	0.172335	1.36807	0.574282	MOCK	COVID	26S proteasome non-ATPase regulatory subunit 3 OS=Homo sapiens OX=9606 GN=PSMD3 PE=1 SV=2	42878.7	65081.6	46229.4	34563.9	84158.7	62217.2	71679.8	82223.2	83704.4	102683	68260.8	51901	93851	112385	82859.4	73384.2
Q93079	47	25	289.684	0.037773	0.172783	1.20514	0.569627	MOCK	COVID	Histone H2B type 1-H OS=Homo sapiens OX=9606 GN=H2BC9 PE=1 SV=3	1.46324e+06	1.89384e+06	2.18452e+06	2.17904e+06	2.78993e+06	2.37246e+06	2.65624e+06	2.88054e+06	2.46111e+06	2.45329e+06	2.61265e+06	2.73115e+06	2.59518e+06	2.95554e+06	3.21668e+06	3.17275e+06
Q15056	5	3	37.1306	0.039056	0.176136	1.24415	0.563191	MOCK	COVID	Eukaryotic translation initiation factor 4H OS=Homo sapiens OX=9606 GN=EIF4H PE=1 SV=5	16187.6	19977.8	16808.4	14242.7	17868.1	18346.1	12752	12723.4	21667.6	17699.9	15764.8	14893.3	23092.9	27635	19894.7	19730.7
P61077	3	1	21.702	0.0423092	0.184317	1.2352	0.547655	MOCK	COVID	Ubiquitin-conjugating enzyme E2 D3 OS=Homo sapiens OX=9606 GN=UBE2D3 PE=1 SV=1	26988.4	24948.2	33316.1	30577.5	40754.3	41727.7	44474.4	47229.3	39296	42909.3	44440.2	50645.9	38501.7	36337	49101.6	56995
P06454	4	2	29.4505	0.0431701	0.185995	1.51855	0.543719	MOCK	COVID	Prothymosin alpha OS=Homo sapiens OX=9606 GN=PTMA PE=1 SV=2	1350.15	6403.64	1380.93	6010.71	18556	3844.29	24784.4	29139.5	17450.8	19519.1	18268.3	17268.7	13046.1	16919.8	18411.8	18016.7
Q86VP6	27	16	163.144	0.0435658	0.185995	1.26383	0.541933	MOCK	COVID	Cullin-associated NEDD8-dissociated protein 1 OS=Homo sapiens OX=9606 GN=CAND1 PE=1 SV=2	455988	451218	451956	397035	759852	884104	823919	917523	868007	883506	868440	748383	727261	765018	850456	787040
P50990	18	9	129.572	6.65529e-07	0.000426202	1.43632	1	COVID	MOCK	T-complex protein 1 subunit theta OS=Homo sapiens OX=9606 GN=CCT8 PE=1 SV=4	195839	216988	164677	158621	193470	205536	187824	192938	124002	140104	125680	129985	133904	145185	126176	130364
P38646	38	28	309.154	5.2959e-05	0.00847867	1.74124	0.999575	COVID	MOCK	Stress-70 protein_ mitochondrial OS=Homo sapiens OX=9606 GN=HSPA9 PE=1 SV=2	617782	718418	673707	622787	407213	470522	392975	413083	311290	317426	318260	325742	264784	279609	330734	331132
P51858	4	4	29.4206	0.000128684	0.0164817	1.62987	0.998017	COVID	MOCK	Hepatoma-derived growth factor OS=Homo sapiens OX=9606 GN=HDGF PE=1 SV=1	305396	413827	384877	376113	409152	450295	335585	385413	202882	273385	175738	175632	266013	360074	204012	220116
P11171	7	4	37.196	0.000174413	0.0186155	1.52637	0.996819	COVID	MOCK	Protein 4.1 OS=Homo sapiens OX=9606 GN=EPB41 PE=1 SV=4	61955.6	55853.6	80057.4	78467	53466.9	51043.5	56559.7	65682.5	48490.5	33579.4	47790.6	44702	37755.4	31219.9	42443.6	43614.9
P61224	13	1	101.635	0.000223158	0.0189034	1.16759	0.995425	COVID	MOCK	Ras-related protein Rap-1b OS=Homo sapiens OX=9606 GN=RAP1B PE=1 SV=1	132037	138568	128372	138775	138525	136334	151643	158724	117992	119759	124885	128384	107289	119828	118758	124894
P62937	47	28	421.078	0.000247296	0.0189034	1.23116	0.994702	COVID	MOCK	Peptidyl-prolyl cis-trans isomerase A OS=Homo sapiens OX=9606 GN=PPIA PE=1 SV=2	2.44408e+06	2.56206e+06	2.7662e+06	2.67413e+06	2.34703e+06	1.99584e+06	2.22289e+06	2.41422e+06	1.9168e+06	2.01562e+06	2.08522e+06	2.10008e+06	2.00269e+06	1.75547e+06	1.94643e+06	1.95666e+06
O15144	19	12	160.174	0.00028095	0.0189034	1.24514	0.993669	COVID	MOCK	Actin-related protein 2/3 complex subunit 2 OS=Homo sapiens OX=9606 GN=ARPC2 PE=1 SV=1	210395	225317	189462	183208	175445	189740	165828	170101	158729	138885	153492	141749	161436	136125	161845	160055
P42167	23	11	162.046	0.00038198	0.022238	1.17639	0.990446	COVID	MOCK	Lamina-associated polypeptide 2_ isoforms beta/gamma OS=Homo sapiens OX=9606 GN=TMPO PE=1 SV=2	175342	196827	190158	180133	165602	175497	203854	208782	152240	143933	160546	167612	155235	157768	168023	166500
P60660	17	10	157.866	0.000610593	0.0270548	1.23228	0.98289	COVID	MOCK	Myosin light polypeptide 6 OS=Homo sapiens OX=9606 GN=MYL6 PE=1 SV=2	340597	401555	357008	367261	306157	369533	329463	353814	296637	348526	283513	310912	255283	281974	263270	252704
Q06830	29	18	244.758	0.000658596	0.0270548	1.20425	0.981296	COVID	MOCK	Peroxiredoxin-1 OS=Homo sapiens OX=9606 GN=PRDX1 PE=1 SV=1	530218	506106	464674	437310	444399	436549	513430	536597	390404	385602	424477	431925	335511	409092	410938	425071
P62979	4	3	35.5409	0.000806376	0.0270548	1.45848	0.976418	COVID	MOCK	Ubiquitin-40S ribosomal protein S27a OS=Homo sapiens OX=9606 GN=RPS27A PE=1 SV=2	41676.3	28667.7	42761.4	35564.2	36454.5	30876.6	39828.5	42971.7	26042.8	23306.4	28225.1	29681.3	21237.4	16799.9	29997.6	29581.1
Q6S8J3	36	0	418.971	0.000981822	0.0270548	1.23213	0.970719	COVID	MOCK	POTE ankyrin domain family member E OS=Homo sapiens OX=9606 GN=POTEE PE=2 SV=3	3.75136e+06	4.69944e+06	4.45679e+06	4.65739e+06	4.29535e+06	4.72867e+06	4.84852e+06	5.42977e+06	3.37138e+06	3.63181e+06	4.17093e+06	4.34684e+06	3.52384e+06	3.35408e+06	3.78092e+06	3.74186e+06
P0DPH7	23	0	260.071	0.00100742	0.0270548	1.18435	0.969898	COVID	MOCK	Tubulin alpha-3C chain OS=Homo sapiens OX=9606 GN=TUBA3C PE=1 SV=1	777388	682687	616072	596570	656433	705190	610840	673531	590377	606864	514004	531567	562091	627787	534500	523645
Q9UHD8	38	19	280.351	0.00101393	0.0270548	1.23447	0.96969	COVID	MOCK	Septin-9 OS=Homo sapiens OX=9606 GN=SEPTIN9 PE=1 SV=2	628193	718505	652531	631116	567912	668265	618288	706833	514189	535344	581429	652045	467553	431576	506939	516497
P35579	176	102	1618.85	0.00107264	0.0274764	1.22698	0.967818	COVID	MOCK	Myosin-9 OS=Homo sapiens OX=9606 GN=MYH9 PE=1 SV=4	3.29565e+06	4.33858e+06	3.41034e+06	3.71916e+06	3.75415e+06	4.69471e+06	3.86608e+06	4.08533e+06	3.09321e+06	3.31222e+06	2.94816e+06	2.98012e+06	2.91139e+06	3.57793e+06	3.26468e+06	3.3113e+06
P59768	1	0	12.3138	0.00120317	0.0293225	1.41586	0.963711	COVID	MOCK	Guanine nucleotide-binding protein G(I)/G(S)/G(O) subunit gamma-2 OS=Homo sapiens OX=9606 GN=GNG2 PE=1 SV=2	3379.83	2386.72	4125.08	3566.92	3440.7	4291.19	2774.26	3583.92	2490.85	2931.34	2103.28	2557.58	2798.64	1947.95	2329.8	2297.77
P30740	13	6	116.31	0.00129403	0.0293225	1.18819	0.960897	COVID	MOCK	Leukocyte elastase inhibitor OS=Homo sapiens OX=9606 GN=SERPINB1 PE=1 SV=1	155762	200821	175570	175415	164750	183664	195218	197648	146631	166958	160587	166138	134468	138797	150270	155525
Q96B97	36	24	236.348	0.00132786	0.0293225	1.17425	0.959859	COVID	MOCK	SH3 domain-containing kinase-binding protein 1 OS=Homo sapiens OX=9606 GN=SH3KBP1 PE=1 SV=2	196357	224842	179709	182037	166216	199815	195478	210026	160713	174079	181436	171438	151929	154756	164322	165137
P61978	37	29	332.766	0.00143386	0.0296205	1.14259	0.956639	COVID	MOCK	Heterogeneous nuclear ribonucleoprotein K OS=Homo sapiens OX=9606 GN=HNRNPK PE=1 SV=1	732747	721679	760316	722487	697903	836252	710361	778822	571659	678009	631946	612100	709001	717384	646742	649880
P49458	5	3	30.8213	0.00197593	0.0372169	1.17746	0.940941	COVID	MOCK	Signal recognition particle 9 kDa protein OS=Homo sapiens OX=9606 GN=SRP9 PE=1 SV=2	138457	133399	156333	151429	162273	144054	144673	160093	124327	110444	132336	149125	124029	111658	121604	137736
P48643	26	16	203.977	0.00206429	0.0377282	1.18047	0.938497	COVID	MOCK	T-complex protein 1 subunit epsilon OS=Homo sapiens OX=9606 GN=CCT5 PE=1 SV=1	155247	175425	164146	163335	126292	175363	143816	144174	128535	125797	125266	130719	132559	135015	141548	137598
P62834	14	6	85.0996	0.00221721	0.0377282	1.1861	0.934339	COVID	MOCK	Ras-related protein Rap-1A OS=Homo sapiens OX=9606 GN=RAP1A PE=1 SV=1	103717	122948	105807	111691	90180.1	87971.4	103541	104997	84660.5	88714.4	85786.4	91964.2	75787.7	91951.1	88693	92935.7
Q92945	21	13	150.283	0.00223873	0.0377282	1.23729	0.933761	COVID	MOCK	Far upstream element-binding protein 2 OS=Homo sapiens OX=9606 GN=KHSRP PE=1 SV=4	468430	440710	482381	458978	365758	568870	496340	546922	410241	394040	384504	412510	324872	375885	412478	379633
P17980	16	5	106.938	0.00233971	0.038419	1.50461	0.931071	COVID	MOCK	26S proteasome regulatory subunit 6A OS=Homo sapiens OX=9606 GN=PSMC3 PE=1 SV=3	373092	542215	449509	448524	293790	440915	284183	315411	249231	369913	210481	241240	233597	327626	228099	231811
P01893	8	1	71.1605	0.00242872	0.0388835	1.2587	0.928731	COVID	MOCK	Putative HLA class I histocompatibility antigen_ alpha chain H OS=Homo sapiens OX=9606 GN=HLA-H PE=5 SV=3	130037	147351	109613	111683	100080	89267.3	115373	128882	89918.7	84553.8	98400.3	100751	95554.4	93210.9	90255.4	88029.2
P34931	16	4	148.119	0.00336297	0.051277	1.44038	0.905725	COVID	MOCK	Heat shock 70 kDa protein 1-like OS=Homo sapiens OX=9606 GN=HSPA1L PE=1 SV=2	613897	762163	516619	482835	664542	743425	557468	589673	391370	433837	293195	282035	524728	583868	472157	441938
P39687	16	4	147.848	0.00346283	0.0515716	1.1923	0.903418	COVID	MOCK	Acidic leucine-rich nuclear phosphoprotein 32 family member A OS=Homo sapiens OX=9606 GN=ANP32A PE=1 SV=1	229941	263053	230959	223055	207386	304669	225894	231613	207275	203067	192356	207480	175475	192727	220075	208995
Q9UI08	22	15	184.418	0.00478826	0.0681417	1.2825	0.875067	COVID	MOCK	Ena/VASP-like protein OS=Homo sapiens OX=9606 GN=EVL PE=1 SV=2	967164	1.22703e+06	942327	947716	945319	1.34444e+06	854378	920236	651630	960691	687112	784303	716353	914668	844737	794186
Q01082	109	62	713.211	0.00527165	0.0718285	1.19387	0.865635	COVID	MOCK	Spectrin beta chain_ non-erythrocytic 1 OS=Homo sapiens OX=9606 GN=SPTBN1 PE=1 SV=2	1.94664e+06	1.95274e+06	2.1814e+06	2.08379e+06	1.99728e+06	2.33545e+06	2.56793e+06	2.62284e+06	1.62243e+06	1.83828e+06	2.0049e+06	1.9096e+06	1.68077e+06	1.71025e+06	2.00795e+06	2.04161e+06
O43150	3	1	19.1564	0.00601495	0.075691	1.70983	0.851917	COVID	MOCK	Arf-GAP with SH3 domain_ ANK repeat and PH domain-containing protein 2 OS=Homo sapiens OX=9606 GN=ASAP2 PE=1 SV=3	77243.3	92022.2	123416	118210	43014.8	73129.3	97246.4	95116.4	40048.8	30565.8	50237.6	57550.9	42070	41417.7	83299.7	75551.5
P60709	59	0	951.53	0.0060279	0.075691	1.11487	0.851686	COVID	MOCK	Actin_ cytoplasmic 1 OS=Homo sapiens OX=9606 GN=ACTB PE=1 SV=1	1.38442e+07	1.63122e+07	1.50732e+07	1.46968e+07	1.2759e+07	1.55472e+07	1.46138e+07	1.54645e+07	1.17013e+07	1.39552e+07	1.33367e+07	1.35507e+07	1.28959e+07	1.35679e+07	1.36978e+07	1.34152e+07
P63261	90	24	944.283	0.00665816	0.0789602	1.11674	0.840728	COVID	MOCK	Actin_ cytoplasmic 2 OS=Homo sapiens OX=9606 GN=ACTG1 PE=1 SV=1	1.43493e+07	1.66969e+07	1.59794e+07	1.56417e+07	1.32708e+07	1.59989e+07	1.56192e+07	1.64165e+07	1.21534e+07	1.44638e+07	1.41174e+07	1.43875e+07	1.33252e+07	1.37642e+07	1.44633e+07	1.43382e+07
P25398	9	4	50.2315	0.00729274	0.0795722	1.19707	0.830236	COVID	MOCK	40S ribosomal protein S12 OS=Homo sapiens OX=9606 GN=RPS12 PE=1 SV=3	76404	58787	64374.8	60650.3	70350.3	59676.6	77904	82042.9	57766.6	62058.8	59077.5	61630.6	48712.8	52065.7	57150.6	61150.8
P26641	15	8	113.606	0.00731738	0.0795722	1.26852	0.829839	COVID	MOCK	Elongation factor 1-gamma OS=Homo sapiens OX=9606 GN=EEF1G PE=1 SV=3	897290	1.11903e+06	787838	798280	802976	1.11221e+06	731048	798121	577151	852613	600131	676873	650688	796901	732597	668175
P32119	22	18	197.775	0.00740759	0.0795722	1.14191	0.828391	COVID	MOCK	Peroxiredoxin-2 OS=Homo sapiens OX=9606 GN=PRDX2 PE=1 SV=5	371877	433890	357144	355295	325241	344745	315970	338049	276292	325535	300594	320614	289487	332712	323279	320475
O15143	21	16	192.586	0.00764596	0.0802694	2.88802	0.824611	COVID	MOCK	Actin-related protein 2/3 complex subunit 1B OS=Homo sapiens OX=9606 GN=ARPC1B PE=1 SV=3	306953	676001	780127	693266	151789	167086	155191	168330	145515	139851	147065	147483	114899	105867	138647	133635
P20273	3	1	20.2496	0.00828235	0.0821175	1.58157	0.814831	COVID	MOCK	B-cell receptor CD22 OS=Homo sapiens OX=9606 GN=CD22 PE=1 SV=2	9718.06	11565.4	8118.36	8316.34	14324.2	20224.6	15447.4	17954.5	7302.03	7323.34	8233.68	9614.37	6814.4	7301.69	9660.88	10562.4
Q13404	2	2	13.1345	0.00922229	0.0881479	1.32525	0.801144	COVID	MOCK	Ubiquitin-conjugating enzyme E2 variant 1 OS=Homo sapiens OX=9606 GN=UBE2V1 PE=1 SV=2	21110.3	27621.8	32232.2	32029.4	28513.3	22752.3	23131.8	28091.8	24158.6	15158.1	22240.9	25891.6	20990.2	13842.2	18401.2	21915.2
Q16352	12	4	113.174	0.00942101	0.0887231	1.22583	0.798357	COVID	MOCK	Alpha-internexin OS=Homo sapiens OX=9606 GN=INA PE=1 SV=2	505279	622463	512157	476334	525892	578411	412827	452125	421435	514632	363077	368607	439650	491218	370208	364016
Q16851	7	4	42.2766	0.0107941	0.0973587	1.29936	0.78	COVID	MOCK	UTP--glucose-1-phosphate uridylyltransferase OS=Homo sapiens OX=9606 GN=UGP2 PE=1 SV=5	815798	1.05077e+06	692253	718686	713486	1.01887e+06	630824	693120	490743	764370	503477	588521	569659	730782	645206	581800
A5A3E0	39	4	406.111	0.011661	0.101619	1.22867	0.769145	COVID	MOCK	POTE ankyrin domain family member F OS=Homo sapiens OX=9606 GN=POTEF PE=1 SV=2	2.84942e+06	3.45299e+06	3.64749e+06	3.82303e+06	3.54188e+06	3.69212e+06	4.19096e+06	4.70543e+06	2.84087e+06	2.78435e+06	3.6032e+06	3.69369e+06	2.8497e+06	2.44702e+06	3.04367e+06	3.07541e+06
Q562R1	31	5	328.088	0.0117424	0.101619	1.16157	0.768152	COVID	MOCK	Beta-actin-like protein 2 OS=Homo sapiens OX=9606 GN=ACTBL2 PE=1 SV=2	4.65178e+06	5.69966e+06	5.71514e+06	5.46579e+06	4.48946e+06	4.3257e+06	4.75693e+06	5.02112e+06	3.78117e+06	4.36229e+06	4.84726e+06	4.71384e+06	4.17862e+06	3.75656e+06	4.27438e+06	4.63003e+06
P04083	46	35	464.48	0.0119202	0.101782	1.10764	0.765999	COVID	MOCK	Annexin A1 OS=Homo sapiens OX=9606 GN=ANXA1 PE=1 SV=2	892372	1.02821e+06	888496	820007	820489	889386	822782	875421	803723	801716	716840	725204	829494	865023	829690	781602
P50570	10	7	51.061	0.0138669	0.115328	1.78462	0.74368	COVID	MOCK	Dynamin-2 OS=Homo sapiens OX=9606 GN=DNM2 PE=1 SV=2	101020	138967	70781.2	64951.5	51239.8	83395.2	43384.9	43352.4	30896.4	49641.6	23708.2	24557	56292.9	75369.1	38337.9	35773.1
P04745	15	2	117.355	0.014644	0.116638	1.80036	0.735351	COVID	MOCK	Alpha-amylase 1 OS=Homo sapiens OX=9606 GN=AMY1A PE=1 SV=2	61290	73466.8	86505.6	74214.9	188815	219744	146042	150351	66395.5	81461.5	70436.5	68409.2	61484.2	59413.7	74925	73156.6
P08865	19	12	153.139	0.0151674	0.116638	1.21813	0.729908	COVID	MOCK	40S ribosomal protein SA OS=Homo sapiens OX=9606 GN=RPSA PE=1 SV=4	275300	298916	268322	242398	171088	228840	212473	211299	189105	220619	200465	198272	191311	176838	195293	194955
Q15084	4	2	21.369	0.015228	0.116638	1.40032	0.729286	COVID	MOCK	Protein disulfide-isomerase A6 OS=Homo sapiens OX=9606 GN=PDIA6 PE=1 SV=1	46512.9	53542.9	44624.4	45004.1	36341	46641.9	26673.1	28000.1	21453.7	27519.9	25182.4	21712.9	34541.8	40177.1	31806.5	31367.1
Q8WUM4	17	12	99.4674	0.0153583	0.116638	1.16255	0.727955	COVID	MOCK	Programmed cell death 6-interacting protein OS=Homo sapiens OX=9606 GN=PDCD6IP PE=1 SV=1	1.67668e+06	2.36211e+06	1.73572e+06	1.83746e+06	2.11581e+06	2.11665e+06	1.79551e+06	1.983e+06	1.40921e+06	1.76999e+06	1.75781e+06	1.81092e+06	1.76236e+06	1.80075e+06	1.47751e+06	1.64991e+06
P10809	51	40	470.392	0.015475	0.116638	1.09951	0.72677	COVID	MOCK	60 kDa heat shock protein_ mitochondrial OS=Homo sapiens OX=9606 GN=HSPD1 PE=1 SV=2	780023	901481	739010	772142	670794	811949	699504	742116	688447	699972	677325	676338	699171	724587	697936	699622
Q9NTX5	3	2	14.4217	0.015628	0.116638	1.65422	0.725224	COVID	MOCK	Ethylmalonyl-CoA decarboxylase OS=Homo sapiens OX=9606 GN=ECHDC1 PE=1 SV=2	17093.5	8317.66	16538.1	16159.8	27627.6	25524.4	24280.6	28728.3	11876	13148.5	13904.4	15982.7	10150.9	7692.11	12655.1	13894
P08575	54	36	427.222	0.0156635	0.116638	1.18712	0.724867	COVID	MOCK	Receptor-type tyrosine-protein phosphatase C OS=Homo sapiens OX=9606 GN=PTPRC PE=1 SV=3	1.14975e+06	1.41085e+06	1.0677e+06	1.07515e+06	1.18342e+06	1.56238e+06	1.0849e+06	1.18081e+06	920647	1.23241e+06	911527	1.00427e+06	965025	1.12817e+06	1.03836e+06	983213
Q8NE71	3	2	16.7072	0.0168955	0.122952	1.22705	0.71281	COVID	MOCK	ATP-binding cassette sub-family F member 1 OS=Homo sapiens OX=9606 GN=ABCF1 PE=1 SV=2	8273.19	9742.88	13148.9	13345.4	13549.1	10591.9	11508.8	13064.9	11318.8	9214.4	9266	10012.2	8203.05	8875	9156.65	9929.23
Q15435	4	2	27.0963	0.0176006	0.125237	1.51893	0.706186	COVID	MOCK	Protein phosphatase 1 regulatory subunit 7 OS=Homo sapiens OX=9606 GN=PPP1R7 PE=1 SV=1	86834.3	84403.7	60240.8	63509.5	70789.1	99528.1	45137.4	48162.9	44095.9	57443.9	31235.4	29798.7	61758.1	77943	36505.5	28981.1
Q9NY65	18	2	216.536	0.0178194	0.125401	1.1447	0.704169	COVID	MOCK	Tubulin alpha-8 chain OS=Homo sapiens OX=9606 GN=TUBA8 PE=1 SV=1	451068	369315	325033	296043	380980	384161	349989	374501	330718	304354	295182	308976	326985	340822	343361	310187
Q71U36	30	5	308.061	0.0191833	0.128503	1.38092	0.691981	COVID	MOCK	Tubulin alpha-1A chain OS=Homo sapiens OX=9606 GN=TUBA1A PE=1 SV=1	1.14308e+06	898620	582408	520945	581338	655761	508033	546042	519253	551735	453795	439572	507681	563781	457346	443501
P45880	9	5	62.1734	0.0199029	0.130059	1.32808	0.685802	COVID	MOCK	Voltage-dependent anion-selective channel protein 2 OS=Homo sapiens OX=9606 GN=VDAC2 PE=1 SV=2	601863	1.01291e+06	558148	591287	706195	946122	619413	669023	384258	702173	450222	523882	528056	689346	524260	493441
Q15233	28	19	163.451	0.0211357	0.132279	1.29055	0.67559	COVID	MOCK	Non-POU domain-containing octamer-binding protein OS=Homo sapiens OX=9606 GN=NONO PE=1 SV=4	269742	302403	285996	298152	298282	438141	431169	462900	244064	235437	227165	236755	319325	291867	309405	295355
P06576	44	28	394.18	0.0216381	0.132279	1.09474	0.671555	COVID	MOCK	ATP synthase subunit beta_ mitochondrial OS=Homo sapiens OX=9606 GN=ATP5F1B PE=1 SV=3	931064	1.02985e+06	846339	836615	861481	865260	859406	933481	776088	830696	715625	795720	839053	899592	831591	855174
Q9H0U4	10	1	85.5639	0.0216883	0.132279	1.25209	0.671156	COVID	MOCK	Ras-related protein Rab-1B OS=Homo sapiens OX=9606 GN=RAB1B PE=1 SV=1	172856	193420	150843	143898	213464	275898	204953	218716	147957	176579	148952	141718	167686	169939	158301	146004
P52597	27	16	178.018	0.0221503	0.133494	1.10085	0.667513	COVID	MOCK	Heterogeneous nuclear ribonucleoprotein F OS=Homo sapiens OX=9606 GN=HNRNPF PE=1 SV=3	164069	175883	176812	164811	170965	190722	188293	210796	168402	150751	162256	151532	166950	158555	176759	175009
Q16666	7	3	43.6495	0.0225132	0.133494	2.1807	0.664692	COVID	MOCK	Gamma-interferon-inducible protein 16 OS=Homo sapiens OX=9606 GN=IFI16 PE=1 SV=3	53610.5	72469.2	51691.4	47946.4	210017	226688	136062	139717	46919.6	65558.1	36078.8	36163	55045.1	98297.3	45908	46259.6
Q14498	4	1	21.4073	0.0236762	0.134573	1.34678	0.655878	COVID	MOCK	RNA-binding protein 39 OS=Homo sapiens OX=9606 GN=RBM39 PE=1 SV=2	62818.2	63242	84407.4	74004.3	73343.2	76216.7	88198.4	91150.1	54987.6	51906.9	71795.1	67553.3	51814.3	24842.1	65997.8	66544.8
P61158	40	26	333.033	0.0237459	0.134573	1.39765	0.65536	COVID	MOCK	Actin-related protein 3 OS=Homo sapiens OX=9606 GN=ACTR3 PE=1 SV=3	707520	853954	874472	814204	1.56796e+06	1.16295e+06	1.46631e+06	1.53764e+06	779878	841693	770570	807900	777835	758351	870399	822044
Q8IYD8	6	3	41.6171	0.0253305	0.142294	1.19781	0.643896	COVID	MOCK	Fanconi anemia group M protein OS=Homo sapiens OX=9606 GN=FANCM PE=1 SV=2	23531.4	25515.4	30074.3	28111.9	24702.5	28269.6	30851.1	27262.3	22953.9	25124.4	28353.3	29067.6	18243	16904.6	20098.8	21518.8
P28838	10	5	54.3367	0.0271717	0.15131	1.31138	0.63126	COVID	MOCK	Cytosol aminopeptidase OS=Homo sapiens OX=9606 GN=LAP3 PE=1 SV=3	128509	116606	143213	129134	81645.7	83188.5	80081.1	81453.4	80578.9	100782	83837.6	93166.5	72715.3	64983.9	72239.3	75163.2
Q92688	10	4	127.556	0.0278436	0.153715	1.20541	0.626817	COVID	MOCK	Acidic leucine-rich nuclear phosphoprotein 32 family member B OS=Homo sapiens OX=9606 GN=ANP32B PE=1 SV=1	174987	188884	170284	157463	199629	292365	202473	207501	168034	183669	154427	156854	166608	177952	158503	155985
Q9BQE3	23	0	293.455	0.0284492	0.155716	1.34125	0.622885	COVID	MOCK	Tubulin alpha-1C chain OS=Homo sapiens OX=9606 GN=TUBA1C PE=1 SV=1	1.05064e+06	800236	532861	477023	555570	606250	469314	507537	498446	512300	419719	404788	488572	538077	440343	425202
P49903	7	3	45.2622	0.0293111	0.159074	1.1926	0.617403	COVID	MOCK	Selenide_ water dikinase 1 OS=Homo sapiens OX=9606 GN=SEPHS1 PE=1 SV=2	89074.3	121704	95564.4	97817.4	81676.7	109589	108417	106600	79933.3	70513.6	90927.8	112987	69262.4	73047.5	94275.5	88613
Q9UKY7	5	3	36.0884	0.0304603	0.162238	1.26638	0.610294	COVID	MOCK	Protein CDV3 homolog OS=Homo sapiens OX=9606 GN=CDV3 PE=1 SV=1	18086.3	18994.7	22204.6	18302	16566.5	13072.4	13364.6	13773.5	14978.7	13170.1	13007.7	14012.6	13408.8	8129.62	14645.1	14748.9
P21796	19	8	127.436	0.0315184	0.164099	1.24875	0.603939	COVID	MOCK	Voltage-dependent anion-selective channel protein 1 OS=Homo sapiens OX=9606 GN=VDAC1 PE=1 SV=2	370035	355630	279437	265407	281002	295092	211154	232699	230363	237352	185245	184006	285670	294021	203699	213837
Q8N163	13	8	90.3861	0.0330726	0.1648	1.11337	0.594914	COVID	MOCK	Cell cycle and apoptosis regulator protein 2 OS=Homo sapiens OX=9606 GN=CCAR2 PE=1 SV=2	975593	1.07621e+06	1.02076e+06	956003	965342	1.17458e+06	878863	911714	797608	881196	833509	858452	850752	1.04855e+06	971712	906822
P22314	46	24	400.148	0.0330945	0.1648	1.31527	0.59479	COVID	MOCK	Ubiquitin-like modifier-activating enzyme 1 OS=Homo sapiens OX=9606 GN=UBA1 PE=1 SV=3	1.73086e+06	2.95418e+06	1.83552e+06	1.85409e+06	1.53061e+06	2.06958e+06	1.30915e+06	1.33841e+06	1.14988e+06	1.6463e+06	1.20478e+06	1.26149e+06	1.41498e+06	1.77458e+06	1.33986e+06	1.32551e+06
Q8WYJ6	20	11	173.321	0.0334232	0.1648	1.10472	0.592928	COVID	MOCK	Septin-1 OS=Homo sapiens OX=9606 GN=SEPTIN1 PE=1 SV=2	338833	395839	366789	347297	460672	416065	394510	424767	375350	338362	358284	372351	376414	344104	335649	346150
P68363	24	0	312.772	0.0337723	0.1648	1.33193	0.590966	COVID	MOCK	Tubulin alpha-1B chain OS=Homo sapiens OX=9606 GN=TUBA1B PE=1 SV=1	1.21309e+06	998226	642279	571631	669008	794323	561122	611151	596857	659261	489207	484622	609429	675817	529900	505323
P14174	7	3	42.5398	0.0340132	0.1648	1.23443	0.589622	COVID	MOCK	Macrophage migration inhibitory factor OS=Homo sapiens OX=9606 GN=MIF PE=1 SV=4	225692	275154	284523	272199	179138	173159	190068	193002	174569	142791	189614	212984	175906	174298	185759	196520
P23368	4	2	20.7732	0.0342853	0.1648	1.57969	0.588114	COVID	MOCK	NAD-dependent malic enzyme_ mitochondrial OS=Homo sapiens OX=9606 GN=ME2 PE=1 SV=1	11245.1	10793.3	9398.28	8874.76	23569	24303	19834.5	23118.9	10905.8	11686.4	10504.2	11148.5	10419.8	10119.9	8963.62	9265.87
P62277	8	5	50.2149	0.034741	0.1648	1.35177	0.585611	COVID	MOCK	40S ribosomal protein S13 OS=Homo sapiens OX=9606 GN=RPS13 PE=1 SV=2	58158.2	55320.1	65454.1	63613.7	98034.2	128412	83659.7	90299.2	58526.1	62841.4	53892	48714.4	58395.2	80964.2	59145.8	53156.8
Q15365	20	13	176.977	0.0375427	0.172783	1.29282	0.570802	COVID	MOCK	Poly(rC)-binding protein 1 OS=Homo sapiens OX=9606 GN=PCBP1 PE=1 SV=2	641682	739652	521645	503024	488074	533509	404661	460787	360110	396128	289606	258462	521292	566346	476029	452704
P62701	18	15	136.807	0.0390468	0.176136	1.35353	0.563236	COVID	MOCK	40S ribosomal protein S4_ X isoform OS=Homo sapiens OX=9606 GN=RPS4X PE=1 SV=2	256781	338486	218937	214695	152432	176413	147489	168748	201232	151316	119640	110101	172798	192020	147112	142529
P24752	12	5	100.499	0.0400005	0.179134	1.40623	0.558568	COVID	MOCK	Acetyl-CoA acetyltransferase_ mitochondrial OS=Homo sapiens OX=9606 GN=ACAT1 PE=1 SV=1	1.83401e+06	2.20113e+06	1.43199e+06	1.82644e+06	1.23219e+06	1.79999e+06	1.12057e+06	1.17471e+06	819382	1.10035e+06	535918	718929	1.1449e+06	1.86668e+06	1.36742e+06	1.42152e+06
P60174	53	42	406.885	0.0404772	0.18001	1.10456	0.55627	COVID	MOCK	Triosephosphate isomerase OS=Homo sapiens OX=9606 GN=TPI1 PE=1 SV=3	977234	1.30051e+06	1.11539e+06	1.04999e+06	934824	1.10675e+06	1.04253e+06	1.14013e+06	929552	1.04805e+06	903365	911475	951160	1.07465e+06	1.0231e+06	1.00555e+06
P60891	9	1	58.0364	0.0417476	0.183116	1.161	0.550261	COVID	MOCK	Ribose-phosphate pyrophosphokinase 1 OS=Homo sapiens OX=9606 GN=PRPS1 PE=1 SV=2	114123	130313	118217	121755	151206	168624	138739	157391	138390	103907	130119	133874	109857	106211	106059	119360
P81605	3	2	22.2086	0.043389	0.185995	1.14975	0.542729	COVID	MOCK	Dermcidin OS=Homo sapiens OX=9606 GN=DCD PE=1 SV=2	23382.4	23552.2	24653.7	23758.4	21878.3	21255.9	23444.6	22565	15906.7	20427.9	20362.4	22883.3	17289.1	14943.9	23848.1	24799.8
P00367	41	13	283.241	0.0439082	0.186216	1.788	0.540399	COVID	MOCK	Glutamate dehydrogenase 1_ mitochondrial OS=Homo sapiens OX=9606 GN=GLUD1 PE=1 SV=2	968541	959163	1.39239e+06	1.43746e+06	384233	465574	399896	449281	451808	439371	446993	455098	442398	393430	496272	485660
P14649	11	6	88.8707	0.0464979	0.191674	1.17022	0.52913	COVID	MOCK	Myosin light chain 6B OS=Homo sapiens OX=9606 GN=MYL6B PE=1 SV=1	173117	176886	250394	258666	178576	242361	228879	213226	159299	163166	187697	186125	173094	190331	213073	198823
P10515	5	3	26.1554	0.0468952	0.191674	1.25755	0.527451	COVID	MOCK	Dihydrolipoyllysine-residue acetyltransferase component of pyruvate dehydrogenase complex_ mitochondrial OS=Homo sapiens OX=9606 GN=DLAT PE=1 SV=3	18483.4	20908.1	13145	13481.1	16649.9	23109	14418.5	16967.6	15404.6	18584.3	11331.1	10986.9	14201.5	16902.5	11409.5	10250.8
P07737	49	34	339.171	0.0470214	0.191674	1.13483	0.52692	COVID	MOCK	Profilin-1 OS=Homo sapiens OX=9606 GN=PFN1 PE=1 SV=2	2.03639e+06	2.75734e+06	2.10275e+06	1.99834e+06	2.05877e+06	2.69882e+06	2.38883e+06	2.49039e+06	1.84819e+06	2.36395e+06	1.95052e+06	2.10761e+06	1.87078e+06	2.26302e+06	1.97124e+06	1.95461e+06
Q9Y230	5	1	32.7822	0.0475278	0.191674	1.23737	0.524803	COVID	MOCK	RuvB-like 2 OS=Homo sapiens OX=9606 GN=RUVBL2 PE=1 SV=3	215624	187451	204568	255669	190406	183685	295352	312577	153229	161583	204545	248774	162414	171372	182143	207278
P62736	94	47	556.825	0.0478864	0.191674	1.16445	0.523317	COVID	MOCK	Actin_ aortic smooth muscle OS=Homo sapiens OX=9606 GN=ACTA2 PE=1 SV=1	5.01305e+06	6.24912e+06	6.9549e+06	7.13651e+06	6.3296e+06	5.7194e+06	7.28842e+06	7.86756e+06	5.18244e+06	4.77902e+06	6.31666e+06	6.79363e+06	5.27424e+06	4.78864e+06	5.83155e+06	6.16969e+06
P17987	18	9	101.683	0.047889	0.191674	1.13911	0.523306	COVID	MOCK	T-complex protein 1 subunit alpha OS=Homo sapiens OX=9606 GN=TCP1 PE=1 SV=1	97007.6	87354	97626.4	94172.4	100548	108094	125301	134331	93476.9	95690.3	101404	96140.9	85551.7	85028.1	94462.7	89553.9
Q9UBT2	4	2	24.3589	0.0503058	0.200097	1.23414	0.513542	COVID	MOCK	SUMO-activating enzyme subunit 2 OS=Homo sapiens OX=9606 GN=UBA2 PE=1 SV=2	50839.7	39076	37355.8	32218.4	26000.3	31592.2	27378.5	27890.9	25430.4	28150.9	24237.9	24487.8	27856.8	35939.6	26685.4	27892.6
