# Supplementary material for: SARS-CoV-2 uses CD4 to infect T helper lymphocytes
Source: eLife. 2023 Jul 31;12:e84790. doi: 10.7554/eLife.84790 (PMC10390044; doi:10.7554/eLife.84790)
Supplement: Supplementary file 3. [file elife-84790-supp3.xlsx]

## Sheet: Table 1
Supplementary File 3
Antibody/Dye	Conjugation	Clone	Manufacture Catalogue
Anti-CD4 (Human) Monoclonal	FITC	RPA-T4	BD Biosciences Cat.: 555346
Anti-CD4 (Human) Monoclonal	APC	SK3	BD Biosciences Cat.: 566915
Anti-CD4 (Human) Monoclonal	BUV661	SK3	BD Biosciences Cat.: 612962
Anti-CD4 (Human) Polyclonal	Unconjugated	-	Santa Cruz Biotechnology Cat.: sc-7219
Anti-CD4 (Human) Polyclonal	Purified	-	RehaBiotech Cat.:0566
Anti-CD3 (Human) Monoclonal	PercP-Cy5.5	SP34-2	BD Biosciences Cat.: 552852
Anti-CD3 (Human) Monoclonal	BV480	UCHT1	BD Biosciences Cat.: 51-9015420
Anti-CD8a (Human) Monoclonal	PE-Cy7	RPA-T8	eBioscience (ThermoFisher) Cat.: 25-0088-42
Lineage Cocktail 1 (Human)- CD3, CD14, CD16, CD19, CD20, CD56)	FITC	SK7 (CD3), MfP9 (CD14), 3G8 (CD16), SJ25C1 (CD19), L27 (CD20), NCAM16.2 (CD56)	BD Biosciences Cat.: 340546
Zombie Aqua™ Fixable Viability Kit	BUV496	-	BioLegend Cat.: 423101
DAPI	-	-	Santa Cruz Biotechnology Cat.: sc-3598
Anti-CD14 (Human) Monoclonal	BUV805	M5E2	BD Biosciences Cat.: 612902
Anti-CD16 (Human) Monoclonal	BUV496	3G8	BD Biosciences Cat.: 612944
Anti-CD19 (Human) Monoclonal	BUV563	SJ25C1	BD Biosciences Cat.: 51-9016630
Anti-CD45 (Human) Monoclonal	APC-Cy7	2D1	BD Biosciences Cat.: 557833
Anti-CD123 (Human) Monoclonal	PE-Cy5	9F5	BD Biosciences Cat.: 51-9015428
Anti-ACE2 (Human) Polyclonal	Purified	-	RehaBiotech Cat.:0060
Anti-ACE2 (Human) Polyclonal	PE	-	RehaBiotech Cat.:0060
Anti-ACE2 Polyclonal	Unconjugated	-	Abcam Cat. :15348
Anti-Beta Actin Monoclonal	Unconjugated	C4	Santa Cruz Biotechnology Cat.: sc-47778
Anti-GAPDH Polyclonal	Unconjugated	-	Sigma-Aldrich Cat.: G9545
Anti-Vinculin Polyclonal	Unconjugated	-	Abcam Cat.: 91459
Anti-phospho-CREB (Rabbit)/ATF-1 Monoclonal	Unconjugated	87G3	Cell Signaling Tecnology Cat.: 9198
Anti-phospho-STAT3 (Mouse) Monoclonal	Unconjugated	B-7	Santa Cruz Biotechnology Cat.: sc-8059
Anti-Total STAT3 (Rabbit) Monoclonal	Unconjugated	79D7	Cell Signaling Tecnology Cat.: 4904
Anti-IgG (Human) Polyclonal	Alexa Fluor 488	-	ThermoFisher Cat.: A11013
Anti-IgG (Rabbit) Polyclonal	HRP	-	GE Healthcare Cat.: RPN4301
Anti-SARS-CoV-2 Spike S1 (Human) Monoclonal	Unconjugated	HC2001	GenScript Cat.: A02038
