# Supplementary material for: SARS-CoV-2 uses CD4 to infect T helper lymphocytes
Source: eLife. 2023 Jul 31;12:e84790. doi: 10.7554/eLife.84790 (PMC10390044; doi:10.7554/eLife.84790)
Supplement: Supplementary file 4. [file elife-84790-supp4.xlsx]

## Sheet: Planilha1
Supplementary File 4
	Cycle Threshold
	Figure 1 A. CD4 and CD8 infection
	Mock CD4	CoV-2 CD4	Mock CD8	CoV-2 CD8
	36066	29877	35426	33517
	37251	30119	37946	34070
	37119	29449	36066	36416
	Undetermined	29326	35072	36027
	35670	31402	39053	35015
	35464	31821	38385	35516
				36939
				35516
				33464
				33166
Cycle Threshold
Figure 1 D. Temporal CD4 infection
Mock	CoV-2 2h	CoV-2 6h	CoV-2 12h	CoV-2 24h	CoV-2 48h
33245	23202	21556	23728	23352	23725
33271	23592	21683	23755	24293	23875
33271	23422	21408	24831	22300	21702
29962	23619	21331	24555	22827	22423
33920	22361	22188	23432	21818	25832
32177	22888	21953	22782	21238	25996
